# Supplementary material for: Biomass burning emissions in north Australia during the early dry season: an overview of the 2014 SAFIRED campaign
Source: Copernicus journal article supplement (doi:10.5194/acp-2016-866), 2016-11-10
Supplement: Supplementary file 1 [file acp-2016-866-supplement.pdf]

## 1 7. Supplementary

2 Supplementary Figure 1 shows the ambient relative humidity and the aerosol sample  
3 relative humidity after drying by the Automated Regenerating Aerosol Diffusion Dryer  
4 (ARADD). The ARADD was effective in keeping the sample relative humidity below  
5 40% for the entire sampling period. The two periods with RH > 40% correspond to  
6 power outages at ATARS.

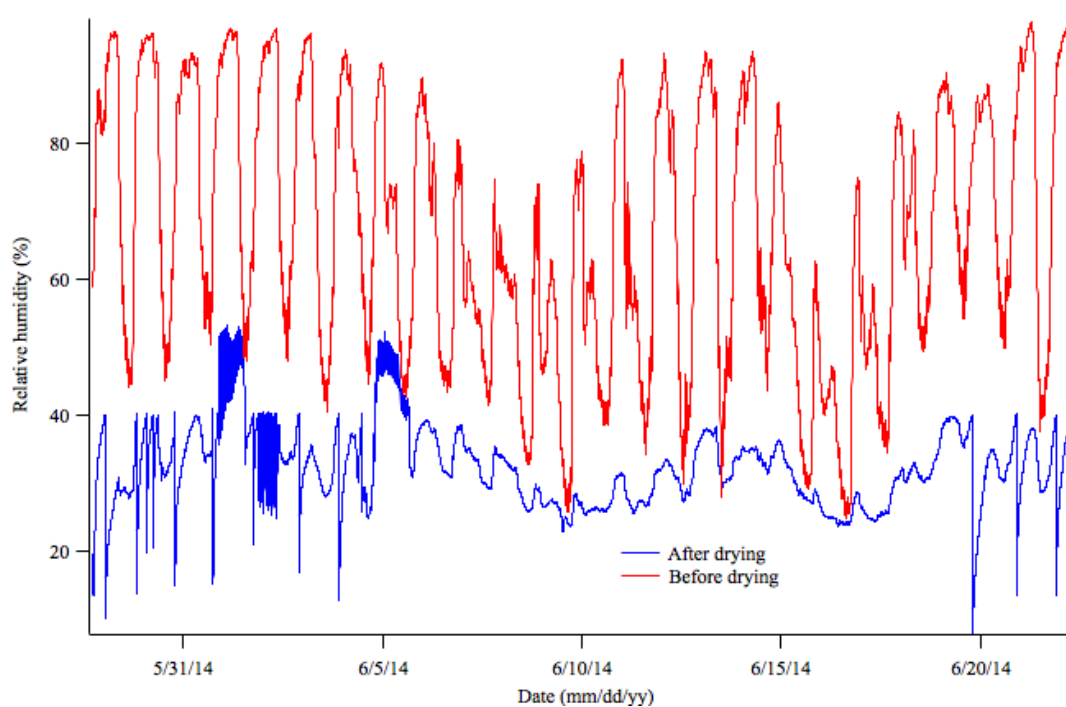

7

8

**Supplementary Figure 1 The ambient and sample relative humidity for the campaign.**

9 Supplementary Figure 3 shows the spectrogram of particle sizes between 1 and 40 nm.  
10 There was a distinct lack of new particle formation over the entire month, likely  
11 attributed to high particle mass loadings acting as a condensation sink.

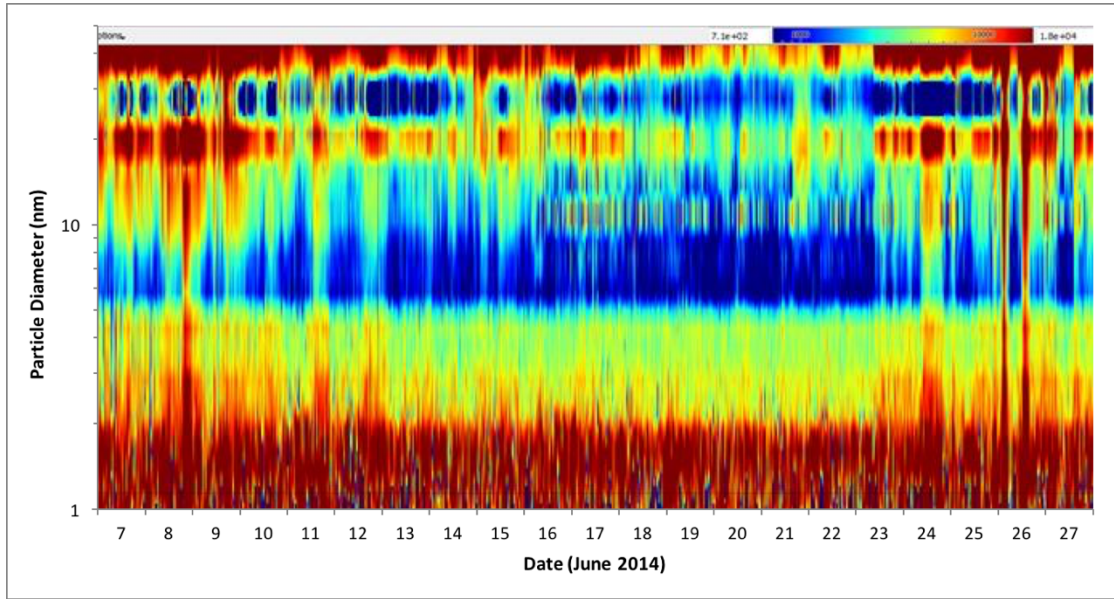

12

13

Supplementary Figure 2 The particle size distributions measured from 1nm up to 40 nm, demonstrating no nucleation events.
